# Supplementary material for: Olanzapine Versus Placebo in Adult Outpatients With Anorexia Nervosa: A Randomized Clinical Trial
Source: Atypon-hosted journal article supplement (doi:10.1176/appi.ajp.2018.18101125), 2019-01-18
Supplement: appi.ajp.2018.18101125.correction01.pdf [file appi.ajp.2018.18101125.correction01.pdf]

## **Correction to Attia et al.**

When the article “Olanzapine Versus Placebo in Adult Outpatients With Anorexia Nervosa: A Randomized Clinical Trial,” by Evelyn Attia et al. (doi: 10.1176/appi.ajp.2018.18101125) was published online on January 18, 2019, in the Results section, the standard errors listed for BMI increase and for the shape concerns subscale of the Epidemiologic Studies Depression Scale were mislabeled as standard deviations, and median olanzapine plasma levels were listed in place of mean values. These errors were corrected and the article was reposted on April 11, 2019.
